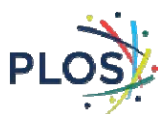

1  
2  
3  
4  
5  
6  
7  
8  
9  
10  
11  
12  
13  
14  
15  
16  
17  
18  
19  
20  
21  
22  
23  
24  
25  
26  
27

Title

**Effects of the introduction of interprofessional conferences on the intensive care unit: Comparison of the length of stay in the intensive care unit before and after the introduction of interprofessional conferences**

Short title: Length of stay in the ICU

Author

Daichi Watanabe<sup>1,2\*</sup>, Keiichi Uranaka<sup>3</sup>, Kyouko Asazawa<sup>3</sup>, Takako Akimoto<sup>4</sup>, and Hironori Ohnuma<sup>5</sup>

<sup>1</sup> Nursing Department, Teine Keijinkai Hospital, Sapporo, Japan

<sup>2</sup> Graduate School of Nursing, Tokyo Healthcare University, Tokyo, Japan

<sup>3</sup> Higashigaoka Faculty of Nursing, Tokyo Healthcare University, Tokyo, Japan

<sup>4</sup> Department of Anesthesia, Teine Keijinkai Hospital, Sapporo, Japan

<sup>5</sup> Information System Development Division, Teine Keijinkai Hospital, Sapporo, Japan

\*Corresponding author

[daichi.watanabe1107@icloud.com](mailto:daichi.watanabe1107@icloud.com) (DW)

28

## 29 **Abstract**

30       Recently, interprofessional team medicine has been practiced to achieve medical safety and  
31 improve patient outcomes. This study evaluated the effects of interprofessional conferences on  
32 intensive care units (ICUs) by comparing outcomes before and after their introduction. This study  
33 was conducted at a single center and included 1,765 patients who were admitted to the ICU between  
34 April 2017 and March 2019. There were 898 patients in the group before the introduction of  
35 conferences (before group) and 867 patients in the group after the introduction of conferences (after  
36 group). The interprofessional conferences involved physicians, nurses, physical therapists,  
37 nutritionists, and pharmacists. Data were extracted from the medical records. The primary outcome  
38 measure was the ICU length of stay (LOS). The secondary outcome measures were hospital LOS  
39 and rehabilitation and nutrition started within 48 hours of ICU admission. These outcomes were  
40 compared before and after the introduction of interprofessional conferences. The adjusted variables  
41 were gender, age, body mass index, ICU readmission, outcome, Barthel index at admission, and  
42 disease (classified by the International Statistical Classification of Diseases and Related Health  
43 Problems 10<sup>th</sup> edition). The ICU LOS (regression coefficient: -0.08; 95% confidence interval [CI]:  
44 -0.13 to -0.04) and hospital LOS (regression coefficient: -2.96; 95% CI: -5.20 to -0.72) were  
45 significantly shorter in after group than in the before group. Moreover, the proportion of patients  
46 who commenced nutrition (odds ratio [OR]: 1.45; 95% CI: 1.14 to 1.84) and rehabilitation (OR:  
47 0.77; 95% CI: 0.51 to 1.17) within 48 hours of ICU admission was significantly higher in the after  
48 group than in the before group. Interprofessional conferences effectively reduced the ICU LOS and  
49 hospital LOS and improved the likelihood of commencing nutrition and rehabilitation within 48  
50 hours of ICU admission.

51

52

53

54

55

## 56 **Introduction**

57       Recently, a wide variety of staff members have been practicing interprofessional team medicine  
58 based on their high levels of expertise, sharing objectives and information, and following the  
59 individualized needs of each patient [1]. In complex medical environments such as intensive care  
60 units (ICUs), where critically ill patients with limited physiological reserves undergo several tests  
61 and treatments, effective communication among professions is especially important as part of team  
62 medicine [2]. In terms of medical safety, according to the Joint Commission on Accreditation of  
63 Health Organization, communication errors are a major cause of medical errors, which comprise  
64 85% of serious medical incidents in hospitals. It has been suggested that effective communication  
65 can reduce medical errors and improve short-term patient outcomes such as mortality and  
66 readmissions [3]. Additionally, the United States Critical Illness and Injury Trial Group Critical  
67 Illness Outcomes Study has identified that the establishment of a daily medical plan and a lower  
68 nursing ratio are factors that improve patient outcomes [4]. Therefore, the management of critically  
69 ill patients by an interprofessional team led by an intensivist has been proposed to improve the  
70 quality of care by strengthening interprofessional collaboration, with all professionals having parts  
71 of the roles performed by intensivists and utilizing their own expertise [5]. To provide high-quality  
72 patient care, it is essential to share patient care plans among many professionals and facilitate  
73 communication among them.

74       Previous studies performed in Japan and other countries have evaluated the introduction and  
75 implementation of interprofessional protocols, interprofessional rounds, and interprofessional  
76 conferences and their effects on ICU outcomes. As an example of interprofessional protocols, for  
77 patients requiring ventilation for more than 48 hours in the ICU, an interprofessional team  
78 examined the effects of shallow sedation management on safety and ventilator duration using a  
79 quality improvement model. The results of this study reported shallower sedation according to the

80 Richmond Agitation-Sedation Scale during the day, decreased unplanned device extractions, and  
81 decreased ventilator-related adverse events [6]. Additionally, a study of the effects of introducing a  
82 long-term ventilator weaning plan led by an interprofessional team for patients requiring ventilation  
83 in the ICU for more than 21 days reported decreased ICU and in-hospital mortality rates and  
84 decreased ventilator durations [7]. In terms of nutrition, the effects of interprofessional  
85 collaboration have also been evaluated. One study reported that the introduction of an  
86 interprofessional ICU nutrition management protocol resulted in an improvement in the early  
87 enteral nutrition rate within 48 hours of admission to the ICU [8]. Therefore, the introduction of  
88 interprofessional protocols is associated with improved patient outcomes in terms of sedation,  
89 ventilator use, and nutrition.

90 Furthermore, a study of the effects of daily bedside interprofessional rounds on the outcomes of  
91 patients admitted to ICUs at 112 facilities found that interprofessional rounds were associated with  
92 decreased mortality rates within 30 days of admission [9]. Additionally, one study of the effects of  
93 the participation of family members of ICU patients in interprofessional rounds showed that this  
94 participation was associated with better family satisfaction in terms of frequency of communication  
95 with the physician and support during decision-making [10]. Therefore, interprofessional rounds  
96 contribute not only to better patient outcomes but also to better patient and family satisfaction rates.

97 Moreover, one study of the effects of introducing interprofessional conferences in an  
98 open-system ICU reported that the number of days before rehabilitation commenced was reduced  
99 after their introduction compared to the number before their introduction [11]. Another study [12]  
100 verified the beneficial effects of introducing interprofessional conferences on rehabilitation,  
101 including the treatment plan by cardiovascular surgeons and physical therapists, in the ICU, and it  
102 reported decreased endotracheal intubation durations, decreased mean hospital length of stay (LOS),  
103 and decreased mean ICU LOS compared to those before the introduction of interprofessional  
104 conferences. However, all of these studies of interprofessional conferences involved descriptive  
105 statistics or univariate analyses, and confounding factors were not adjusted for, thus making it

106 impossible to conclude the effectiveness of interprofessional conferences. Therefore, we evaluated  
107 the effects of interprofessional conferences that were introduced for the purpose of sharing  
108 treatment plans and information and making decisions about care and medicine to be provided as  
109 part of interprofessional team medicine by performing a multivariate analysis to adjust for  
110 confounding factors and using patient outcomes as indicators.

111

## 112 **Materials and Methods**

### 113 **Terms definition**

114 During this study, an interprofessional conference was defined as an interprofessional team  
115 consisting of a physician and at least one other health care provider [3] sharing treatment plans and  
116 information and making decisions about the care to be provided in the ICU.

117

### 118 **Conceptual framework**

119 The conceptual framework of this study is shown in (Fig 1). During this study, the effects of  
120 interprofessional conferences in ICUs were evaluated before and after their introduction. The  
121 primary outcome measure was the ICU LOS. The ICU LOS before the introduction of  
122 interprofessional conferences and that after their introduction were compared. Secondary outcome  
123 measures were hospital LOS, whether nutrition was started within 48 hours of ICU admission,  
124 whether rehabilitation was started within 48 hours of ICU admission, and mortality within 28 days  
125 of ICU admission. The adjusted variables were gender, age, body mass index (BMI), disease  
126 (International Statistical Classification of Diseases and Related Health Problems 10<sup>th</sup> edition  
127 [ICD-10]), Barthel index (BI) at admission, outcome, ICU readmission, and surgical procedure.

128

129

130

131

132

133

134

135

136

137

138

139

140

141

142

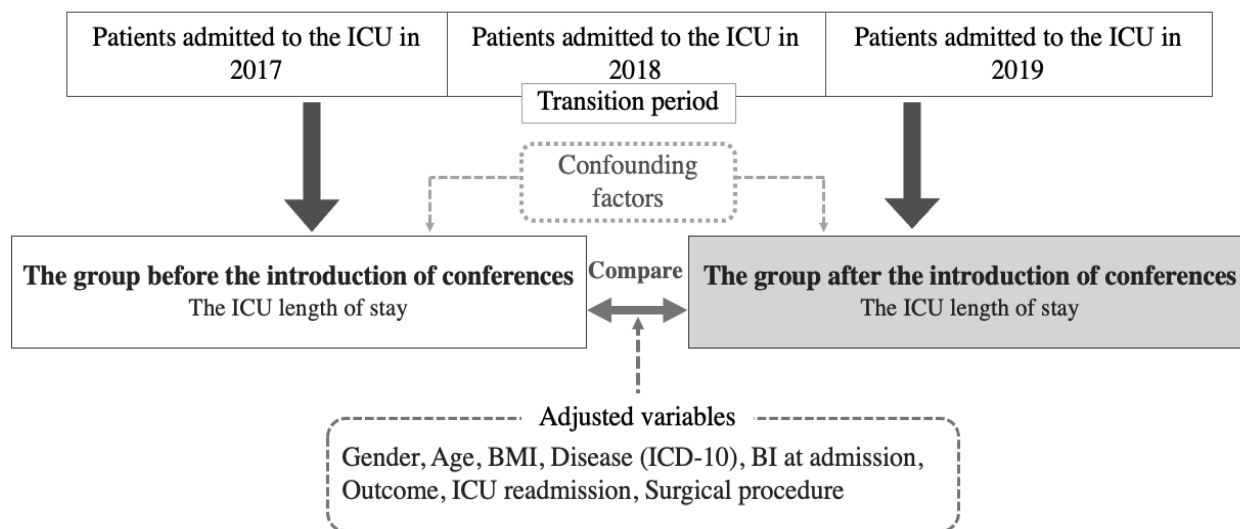

143

Figure1: The conceptual framework of this study

144

BMI: Body mass index, ICD-10: International Statistical Classification of Diseases and Related Health Problems 10<sup>th</sup> edition, BI: Barthel index

145

## 146 Design

147

This was a retrospective observational study. It included medical records from April 2017 to March

148

2019.

149

## 150 Study population and setting

151

The inclusion criterion was admission to the ICU during April 2017 to March 2019. The

152

exclusion criteria were admission to the ICU for less than one night and age 18 years or younger.

153

A specific ICU at a municipal hospital with approximately 700 beds in central Hokkaido, Japan,

154

was selected as the research facility for the study. The ICU at the study site was a medical/surgical

155

ICU with 16 beds and was operated using a semi-closed system. It was staffed by an intensivist and

156

had a patient-to-nurse ratio of 2:1. Staff members during the day shift included a full-time physical

157

therapist, clinical engineer, nutritionist, and pharmacist.

158 The research facility introduced regular interprofessional conferences as part of  
159 interprofessional team care in 2018. In 2019, an operation manual for interprofessional conferences  
160 was created within the ICU department, and the format for recording the conferences in the  
161 electronic medical records was standardized.

162 Conferences were conducted once per week for approximately 30 minutes. One target patient was  
163 determined after a discussion among the interprofessional staff the day before the conference. There  
164 was no clear definition of eligible patients; however, priority was given to patients who were  
165 critically ill, patients whose care or treatment was not progressing as planned, and patients who  
166 were at high risk for such problems.

167 The interprofessional conference participants were physicians, nurses, physical therapists,  
168 nutritionists, pharmacists, clinical engineers, and medical social workers. The purpose of the  
169 interprofessional conferences and the contents of discussions varied depending on the target patient;  
170 however, the main objectives were sharing treatment plans and information and making decisions  
171 about the care and treatment to be provided. Additionally, patient goals and their evaluation dates,  
172 as well as specific care plans to achieve them, were discussed.

173

## 174 **Data collection**

175 After obtaining consent for research cooperation from the administrators of the collaborating  
176 facilities, patient data and the number of conferences conducted were extracted from the medical  
177 records for the study. The survey items included the following patient characteristics: gender; age;  
178 height; weight; disease name (ICD-10); patient outcome (alive or dead); BI at admission (calculated  
179 using a 20-point scale for this study); surgical procedure (including scheduled and emergency  
180 surgeries); ICU readmission; ICU admission date; ICU discharge date; hospital admission date;  
181 discharge date; whether nutrition was started within 48 hours (including enteral and oral nutrition);  
182 whether rehabilitation was started within 48 hours of ICU admission (rehabilitation was defined as  
183 intervention by a physical therapist); and mortality within 28 days of ICU admission.

184

## 185 **Measurements**

### 186 **Intensive care unit length of stay**

187 The ICU LOS was calculated as the difference in the number of days between the date of admission  
188 to the ICU and the date of discharge from the ICU. If the patients were re-admitted to the ICU  
189 within the same admission period, then they were treated as the same patient, and the LOS in the  
190 ICU was calculated by adding the number of days spent in the ICU after the first and subsequent  
191 ICU admissions.

192

### 193 **Hospital length of stay**

194 The hospital LOS was calculated as the number of days between admission to the study facility and  
195 the date of discharge from the facility. If the study patients were discharged and readmitted, then  
196 they were treated as different patients and their hospital LOS were calculated separately.

197

### 198 **Other variables related to the intensive care unit length of stay**

199 Factors related to the ICU LOS were based on previous studies and included patient age, gender,  
200 outcome, surgical procedure, and disease [11]. The BMI [6], ICU readmission [13,14], and BI at  
201 admission [15,16] were also selected as variables.

202

### 203 **Statistical analysis**

204 Descriptive statistics were calculated for each variable, and patient characteristics before and  
205 after the introduction of the interprofessional conferences were compared using the Student t test  
206 and  $\chi^2$  test, depending on the type of variable. The Mann-Whitney U test was also used to compare  
207 the median number of days in the ICU for each variable before and after the introduction of  
208 interprofessional conferences. Correlations between variables were calculated using Pearson's  
209 correlation coefficient and the Spearman rank correlation coefficient, depending on the type of scale.



210 To examine differences in the ICU LOS based on the introduction of interprofessional conferences,  
211 the dependent variable was ICU LOS and the independent variables were before and after the  
212 introduction of interprofessional conferences, gender, age, BMI, ICU readmission, outcome, BI at  
213 admission, and disease (ICD-10); these were forced variables and a Poisson regression analysis was  
214 performed. A multiple regression analysis was performed for the secondary outcome measures; the  
215 dependent variable was hospital LOS and the independent variables were before and after the  
216 introduction of interprofessional conferences, gender, age, BMI, ICU readmission, outcome, BI at  
217 admission, and disease (ICD-10). Regarding whether nutrition was started within 48 hours of ICU  
218 admission and whether rehabilitation was started within 48 hours of ICU admission, the dependent  
219 variables were whether nutrition was started within 48 hours of ICU admission and whether  
220 rehabilitation was started within 48 hours of ICU admission, respectively; the independent variables  
221 were before and after the introduction of interprofessional conference, gender, age, BMI, ICU  
222 readmission, outcome, BI at admission, and disease (ICD-10). We forced those independent  
223 variables and performed a logistic regression analysis. Regarding mortality within 28 days of ICU  
224 admission, a logistic regression analysis was performed with mortality within 28 days of ICU  
225 admission as the dependent variable and forced entry of before and after the introduction of  
226 interprofessional conferences, gender, age, BMI, ICU readmission, BI at admission, and disease  
227 (ICD-10) as the independent variables.

228 All statistical analyses were performed using Stata version 15 (Stata Corp LLC, Lakeway, TX,  
229 USA). Two-sided  $p < 0.05$  was considered statistically significant.

230

## 231 **Ethical considerations**

232 Ethical approval for this study was obtained from the Ethics Review Committee of Teine Keijinkai  
233 Hospital (no. 2-020276-00) and from the Ethics Committee of Tokyo Healthcare University of the  
234 researcher (no. 32-50). Informed consent was obtained using a form provided on the website of the  
235 Teine Keijinkai Hospital; ethical approval was given. There are no conflicts of interest to disclose.

236

## 237 **Results**

238 Details of the interprofessional conferences conducted are shown in Table 1. There were 58  
239 interprofessional conferences conducted in 2019, and 22 patients were the target of those  
240 conferences (in some cases, more than one conference was conducted for a single patient). The  
241 contents of 31 conferences included sharing information about the patients. The contents of 25  
242 conferences included making clear decisions about treatment and treatment plans. The contents of  
243 two conferences included ethics. There were no conferences about unclear records or unavailable  
244 records.

245

246 **Table 1 Number and contents of interprofessional conference**

|                                                   | in 2018 (n=45) | in 2019 (n=58) |
|---------------------------------------------------|----------------|----------------|
| 247 <b>Sharing information about the patients</b> | 29             | 31             |
| 248 <b>Making clear decisions about treatment</b> | 9              | 25             |
| 249 <b>Ethics</b>                                 | 0              | 2              |
| 250 <b>Unclear records</b>                        | 4              | 0              |
| 251 <b>Unavailable records</b>                    | 3              | 0              |

251

252 The characteristics of the study participants are shown in Table 2. The number of study  
253 participants was 1765; there were 898 patients in the group before the introduction of  
254 interprofessional conferences (before group) and 867 patients in the group after the introduction of  
255 interprofessional conference (after group). The mean age of the patients was 69.7 years (standard  
256 deviation [SD]:  $\pm 13.6$  years); 59% were male patients (1043) and 41% were female patients (722).  
257 The mean BMI was 23.3 (SD: 4.5). There were significantly more patients who required  
258 readmission in the before group than in the after group ( $\chi^2=4.76$ ; degrees of freedom=1.0;  $p=0.029$ ).  
259 There were no significant differences in other characteristics of the two groups.

260

261

262  
263  
264  
265  
266  
267  
268  
269  
270  
271  
272  
273  
274  
275  
276  
277  
278  
279  
280  
281  
282  
283  
284  
285  
286  
287

Table2 The characteristics of the study participants (N=1765)

| Variables                 | Bfore group<br>(n=898) |        | After group<br>(n=867) |        | <i>p-value</i> |
|---------------------------|------------------------|--------|------------------------|--------|----------------|
|                           | Mean                   | SD     | Mean                   | SD     |                |
| Age                       | 69.6                   | ± 13.5 | 69.9                   | ± 13.6 | 0.710          |
| BMI                       | 23.2                   | ± 4.7  | 23.4                   | ± 4.2  | 0.420          |
| BI at admission           | 14.3                   | ± 7.9  | 14.1                   | ± 8.2  | 0.690          |
|                           | n                      | %      | n                      | %      |                |
| Gender                    |                        |        |                        |        | 0.890          |
| Male                      | 532                    | 51.0   | 511                    | 49.0   |                |
| Female                    | 366                    | 50.7   | 356                    | 49.3   |                |
| Surgical procedure        | 724                    | 51.8   | 672                    | 48.2   | 0.100          |
| ICU readmission           | 57                     | 61.9   | 35                     | 38.1   | 0.029          |
| Disease (ICD-10)          |                        |        |                        |        | 0.260          |
| Cardiovascular disease    | 342                    | 48.4   | 364                    | 51.6   |                |
| Neoplasms                 | 318                    | 52.3   | 289                    | 47.7   |                |
| Gastrointestinal diseases | 82                     | 49.1   | 85                     | 50.9   |                |
| Other diseases            | 155                    | 54.5   | 129                    | 45.5   |                |
| Patient outcome           |                        |        |                        |        | 0.940          |
| Alive                     | 819                    | 50.9   | 786                    | 49.1   |                |
| Dead                      | 79                     | 49.3   | 81                     | 50.7   |                |

Student t test and  $\chi^2$  test were used to compare patient characteristics before and after the introduction of the interprofessional conferences

Before group : the group before the introduction of conferences, After group : the group after the introduction of conferences

SD : standard deviation, BMI : Body Mass Index, BI : Barthel Index(calculated using a 20-point scale for this study)

ICD-10 : International Statistical Classification of Diseases and Related Health Problems 10th edition

Table 3 shows the results of a comparison of the before and after groups in terms of the ICU LOS and patient characteristics. There were no significant differences in the ICU LOS based on the characteristics of patients in the before and after groups.

288

289

290

291

292

Table3 The ICU LOS and patient characteristics of the before and after groups. (N=1765)

| Variables          | n                         | %    | The ICU LOS of before group |        |      | The ICU LOS of after group |        |      | p-value     |       |
|--------------------|---------------------------|------|-----------------------------|--------|------|----------------------------|--------|------|-------------|-------|
|                    |                           |      | n                           | Median | IQR  | n                          | Median | IQR  |             |       |
| Gender             | Female                    | 722  | 41.0                        | 366    | 2.0  | 2.0 - 5.0                  | 356    | 2.0  | 2.0 - 5.0   | 0.936 |
|                    | Male                      | 1043 | 59.0                        | 532    | 3.0  | 2.0 - 5.0                  | 511    | 3.0  | 2.0 - 5.0   | 0.791 |
| Surgical procedure | Without                   | 369  | 20.9                        | 174    | 2.0  | 2.0 - 5.0                  | 195    | 3.0  | 2.0 - 5.0   | 0.507 |
|                    | With                      | 1369 | 79.1                        | 724    | 3.0  | 2.0 - 5.0                  | 672    | 3.0  | 2.0 - 5.0   | 0.593 |
| ICU readmission    | Without                   | 1673 | 97.8                        | 841    | 2.0  | 2.0 - 5.0                  | 832    | 3.0  | 2.0 - 5.0   | 0.437 |
|                    | With                      | 92   | 5.2                         | 57     | 12.0 | 7.0 - 12.0                 | 35     | 10.0 | 10.0 - 16.0 | 0.131 |
| Disease (ICD-10)   | Cardiovascular disease    | 706  | 40.0                        | 342    | 3.0  | 2.0 - 5.0                  | 364    | 3.0  | 2.0 - 5.0   | 0.795 |
|                    | Neoplasms                 | 607  | 34.4                        | 318    | 2.0  | 2.0 - 3.0                  | 289    | 2.0  | 2.0 - 3.0   | 0.528 |
|                    | Gastrointestinal diseases | 167  | 9.5                         | 82     | 4.0  | 3.0 - 8.0                  | 85     | 3.0  | 2.0 - 6.0   | 0.183 |
|                    | Other diseases            | 287  | 16.1                        | 155    | 4.0  | 2.0 - 9.0                  | 129    | 4.0  | 2.0 - 7.0   | 0.246 |
| Patient outcome    | Alive                     | 1605 | 90.9                        | 819    | 2.0  | 2.0 - 5.0                  | 786    | 3.0  | 2.0 - 5.0   | 0.982 |
|                    | Dead                      | 160  | 9.1                         | 79     | 6.0  | 2.0 - 15.0                 | 81     | 4.0  | 2.0 - 12.0  | 0.400 |

301

The Mann-Whitney U test was used to compare the median number of days in the ICU for each variable before and after the introduction of interprofessional conferences.

302

The ICU LOS : the intensive care unit length of stay, Before group : the group before the introduction of conferences, After group : the group after the introduction of conferences

303

IQR : inter quartile range, ICD-10 : International Statistical Classification of Diseases and Related Health Problems 10th edition

304

The primary and secondary outcome measures were compared by performing a univariate

305

analysis of the before and after groups (Table 4). The results showed no significant difference in the

306

ICU LOS of the before and after groups (p=0.859). The proportion of patients who started nutrition

307

within 48 hours of ICU admission was significantly higher in the after group (67.8%) than in the

308

before group (61.9%) (p=0.009). The proportion of patients who started rehabilitation within 48

309

hours of ICU admission was also significantly higher in the after group (68.0%) than in the before

310

group (58.2%) (p=0.000), and there was no significant difference in the proportion of patients who

311

died within 28 days of ICU admission (p=0.943). Next, correlation coefficients of the independent

312

variables were calculated for variable selection to avoid multicollinearity in the multiple regression

313

analysis model (Table 5). The variables that were significantly correlated with ICU LOS were

314 gender ( $r=0.07$ ), ICU readmission status ( $r=0.34$ ), and outcome ( $r=0.16$ ).

315

316

317

Table4 The primary and secondary outcome measures in the before and after groups (N=1765)

| Outcome measures                                                                          | Bfore group<br>(n=898) | After group<br>(n=867) |        |
|-------------------------------------------------------------------------------------------|------------------------|------------------------|--------|
| ICU LOS, median day (IQR)                                                                 | 3.0 (2.0 - 5.0)        | 3.0 (2.0 - 5.0)        | 0.859  |
| Hospital LOS, median day (IQR)                                                            | 20.0 (11.0 - 37.0)     | 19.0 (10.0 - 31.0)     | 0.023  |
| The proportion of patients who started nutrition within 48 hours of ICU admission, %      | 61.9                   | 67.8                   | 0.009  |
| The proportion of patients who started rehabilitation within 48 hours of ICU admission, % | 58.2                   | 68.0                   | <0.001 |
| Mortality within 28 days of ICU admission, %                                              | 7.2                    | 7.1                    | 0.943  |

324 The Mann-Whitney U test and  $\chi^2$  test were used to compare primary and secondary outcome measures in the before and after the Introduction of interprofessional conferences.

325 Before group : the group before the introduction of conferences, After group : the group after the introduction of conferences

326 ICU LOS : intensive care unit length of stay, Hospital LOS : hospital length of stay, IQR : inter quartile range

326

Table5 Correlation coefficients of the variables (N=1724)

| Variables                   | Gender | Age    | BMI   | ICU readmission | Patient outcome | BI at admission | Surgical procedure | Disease (ICD-10) | Introduction of conferences | ICU LOS |
|-----------------------------|--------|--------|-------|-----------------|-----------------|-----------------|--------------------|------------------|-----------------------------|---------|
| Gender                      | 1.00   |        |       |                 |                 |                 |                    |                  |                             |         |
| Age                         | -0.03  | 1.00   |       |                 |                 |                 |                    |                  |                             |         |
| BMI                         | 0.04   | -0.15* | 1.00  |                 |                 |                 |                    |                  |                             |         |
| ICU readmission             | 0.04   | 0.06*  | -0.03 | 1.00            |                 |                 |                    |                  |                             |         |
| Patient outcome             | 0.03   | 0.04   | -0.03 | 0.10*           | 1.00            |                 |                    |                  |                             |         |
| BI at admission             | -0.01  | -0.07  | 0.01  | -0.12           | -0.35           | 1.00            |                    |                  |                             |         |
| Surgical procedure          | 0.02   | -0.02  | 0.02  | 0.00            | 0.01            | 0.05*           | 1.00               |                  |                             |         |
| Disease (ICD-10)            | 0.00   | 0.01   | 0.02  | 0.06*           | 0.01            | -0.01           | 0.00               | 1.00             |                             |         |
| Introduction of conferences | 0.00   | 0.02   | 0.02  | -0.05           | -0.01           | 0.01            | -0.04              | 0.04             | 1.00                        |         |
| ICU LOS                     | 0.07*  | -0.05  | 0.03  | 0.34*           | 0.16*           | -0.40           | 0.01               | 0.05             | 0.00                        | 1.00    |

333 Correlations between variables were calculated using Pearson's correlation coefficient and the Spearman rank correlation coefficient, depending on the type of scale. \* $p < 0.05$

334 BMI : Body Mass Index, BI : Barthel Index, BI : Barthel Index(calculated using a 20-point scale for this study)

335 ICD-10: ICD-10 : International Statistical Classification of Diseases and Related Health Problems 10th edition

336 ICU LOS : intensive care unit length of stay

335 Additionally, a Poisson regression analysis was performed to determine the association between

336 the primary outcome (ICU LOS) and the introduction of interprofessional conferences (Table 6).

337 The Poisson regression analysis revealed a significant association between ICU LOS and the

338 introduction of interprofessional conferences (partial regression coefficient: -0.08, 95% confidence

339 interval [CI]: -0.13 to -0.04; incidence rate ratio: 0.91, 95% confidence interval: 0.87 to 0.95). Other



366

367

368

369

370

## 371 **Discussion**

### 372 **Effectives of interprofessional conferences on starting nutrition and** 373 **rehabilitation**

374 The start of nutrition within 48 hours of ICU admission and the start of rehabilitation within 48  
375 hours of ICU admission were significantly higher in the after group than in the before group. The  
376 benefits of interprofessional team care include the promotion of shared decision-making among  
377 various medical professionals, patients, and family members, the reduction of medical errors and  
378 disadvantages to patients, and the improvement of the quality of evidence-based care [3,5,17]. The  
379 Japanese guidelines for nutritional therapy for critically ill patients recommend early enteral  
380 nutrition within 24 to 48 hours after ICU admission [18]. During early rehabilitation, it is also  
381 recommended that positioning and early ambulation practices should be the basis for the prevention  
382 of respiratory complications with acute respiratory failure in the ICU [19]. Therefore, it is thought  
383 that interprofessional communication was promoted at the interprofessional conferences, and that  
384 the exchange of knowledge, skills, and experience among the various medical professionals led to  
385 the provision of care based on the evidence of previous studies, which led to the early start of  
386 nutrition and rehabilitation. Information sharing has been identified as one of the factors associated  
387 with interprofessional collaboration that influence early rehabilitation in the ICU [20]. Information  
388 sharing is important when discussing how each professional perceives the patient's condition based  
389 on expertise and when discussing specific care among multiple professionals who are working  
390 together. Furthermore, it has been reported that increased information sharing opportunities have led  
391 to the improved ability to perform activities of daily living of patients in general surgical wards [21],

392 and that facilitating information sharing among multiple professionals may promote early  
393 rehabilitation, prevent complications, and improve the long-term prognosis in the ICU [20].  
394 Therefore, the introduction of interprofessional conferences may have increased opportunities for  
395 information sharing, thus leading to the shared recognition of the characteristics of each  
396 professional and patient, which may have contributed to early rehabilitation.

397

## 398 **Effects of interprofessional conferences on intensive care unit length of** 399 **stay and hospital length of stay**

400 Although there was no significant difference between the two groups according to the  
401 univariate analysis, adjusting for gender, age, BMI, ICU readmission, outcome, BI at admission,  
402 and disease (ICD-10) in the multivariate analysis resulted in significantly lower ICU LOS compared  
403 to that before the introduction of interprofessional conferences. Previous studies have described the  
404 possibility that interprofessional rounds, during which an interprofessional team performs daily  
405 rounds at the patient's bedside, facilitate the implementation of respiratory therapy and nurse  
406 protocols for sedation, thus leading to shorter ventilator use and ICU LOS [22,23]. One study [24]  
407 reported that less than 10% of residents and nurses understood the goals of care; however, after the  
408 introduction of daily goal sheets and interprofessional sharing, the percentage of residents and  
409 nurses who understood the goals of care increased to more than 95%. As a result, there was a  
410 reduction in the ICU LOS. Based on previous studies, it can be inferred that sharing patient goals  
411 and the care and treatment provided by multiple professions contribute to the ICU LOS and  
412 outcomes [24]. During this study, one of the objectives of the interprofessional conferences was to  
413 share the care goals and patient goals; regardless of the format of the interprofessional rounds and  
414 conferences, the sharing of inpatient conditions and goals led to improved patient outcomes, such as  
415 shorter ICU LOS.

416 Furthermore, after the introduction of interprofessional conferences, more patients started  
417 nutrition within 48 hours of admission to the ICU, and more patients started rehabilitation within 48



418 hours of admission to the ICU. Although robust evidence of early enteral nutrition is not available, a  
419 previous study reported that early initiation of nutrition improved hospital LOS and ICU LOS [25].  
420 Additionally, early ambulation and early active exercise for patients admitted to the ICU have been  
421 shown to reduce ICU LOS [26] and hospital LOS [27–29]. Therefore, it is suggested that, in  
422 addition to shared patient goals among professionals, improved care processes, such as the early  
423 start of nutrition and rehabilitation, contributed to the reductions in ICU LOS and hospital LOS.

424

## 425 **Study implications**

426 During this retrospective study, we were able to use a large amount of original data by  
427 extracting a sample from the medical records. This made it possible to compare our outcomes with  
428 those of other studies of interprofessional collaboration.

429 This is the first study to examine the effectiveness of interprofessional conferences in the ICU  
430 after adjusting for confounding factors through a multivariate analysis. The results confirmed that  
431 shorter ICU stays, shorter hospital LOS, and the earlier start of nutrition and rehabilitation were  
432 achieved after the introduction of these conferences. Furthermore, the results suggested that if the  
433 common goals are to promote collaboration among multiple professionals, to activate  
434 communication between professionals, and to share patient conditions, goals, and care among  
435 professionals, then patient outcomes will improve regardless of the form of collaboration (such as  
436 interprofessional rounds, interprofessional protocols, and interprofessional conferences).

437

## 438 **Study limitations**

439 There were three limitations to this study. First, it was a before-and-after comparative study  
440 involving patient data extracted from the medical records. Adjusting for confounding factors  
441 associated with changes in healthcare delivery systems and treatment methods over time was not  
442 possible. Additionally, there was no clear definition of the target patients involved in  
443 interprofessional conferences, which tended to focus on critically ill patients, patients whose

444 treatment or care was not progressing as planned, or patients at high risk for such problems.  
445 Adjusting for confounding factors related to the patient status, such as disease severity, history of  
446 illness, and presence of delirium, was not possible. Therefore, future prospective studies with  
447 random sampling are required to examine the effectiveness of interprofessional conferences in more  
448 detail. Second, the study was conducted at a single center and the sample was biased, which  
449 affected the generalizability of the study results. Third, the study was not able to compare  
450 participants who attended the interprofessional conferences with those who did not. Only 22  
451 patients were targeted by the conferences. Therefore, after accumulating more cases, it will be  
452 necessary to conduct a multivariate analysis to control for confounding factors and to clarify causal  
453 inferences based on propensity scores.

454

## 455 **Conclusion**

456 After the introduction of interprofessional conferences in the ICU, more patients started nutrition  
457 within 48 hours of ICU admission, more patients started rehabilitation within 48 hours of ICU  
458 admission, and shorter ICU LOS and hospital LOS were observed.

459

## 460 **Acknowledgments**

461 We would like to express our sincere gratitude to all patients who provided their medical records for  
462 this study, to Mr. Ohnuma of the System Development Division of the Information Systems  
463 Department at the study facilities for his great cooperation in data collection, and to Associate  
464 Professor Uranaka and Associate Professor Asazawa for their guidance during this study.

465

466

## 467 **References**

468

469 1. Working group for the study of measures to promote team medical care; 2011. Available from:

- 470 <https://www.mhlw.go.jp/stf/shingi/2r9852000001ehf7-att/2r9852000001ehgo.pdf>. Basic  
471 Book Company Concepts and Practical Case Studies for Promoting Team Medicine  
472 Teamiryousuisin no tame no kihon teki na kangae kata to jissenteki jireisyuu(in Japanese). pp.  
473 1–76.
- 474 2. Donchin Y, Gopher D, Olin M, Badihi Y, Biesky M, Sprung CL, et al. A look into the nature  
475 and causes of human errors in the intensive care unit. 1995. Qual Saf Health Care. 2003;12:  
476 143–7; discussion 147. doi: [10.1136/qhc.12.2.143](https://doi.org/10.1136/qhc.12.2.143).
- 477 3. Lane D, Ferri M, Lemaire J, McLaughlin K, Stelfox HT. A systematic review of  
478 evidence-informed practices for patient care rounds in the ICU\*. Crit Care Med. 2013;41:  
479 2015–2029. doi: [10.1097/CCM.0b013e31828a435f](https://doi.org/10.1097/CCM.0b013e31828a435f).
- 480 4. Checkley W, Martin GS, Brown SM, Steven Y, Dabbagh O, Fremont RD, et al. Structure,  
481 process and annual intensive care unit mortality across 69 centers: United States Critical  
482 Illness and Injury Trials Group Critical Illness Outcomes Study (USCIITG-CIOS). Crit Care  
483 Med. 2015;42: 344–356.
- 484 5. Weled BJ, Adzhigirey LA, Hodgman TM, Brill RJ, Spevetz A, Kline AM, et al. Critical care  
485 delivery: The importance of process of care and ICU structure to improved outcomes: An  
486 update from the American College of Critical Care Medicine task force on models of critical  
487 care. Crit Care Med. 2015;43: 1520–1525. doi: [10.1097/CCM.0000000000000978](https://doi.org/10.1097/CCM.0000000000000978).
- 488 6. Kawai Y, Muramatsu K, Yamashita T, Nakamura T, Nishida O. [Safety and effectiveness of  
489 multidisciplinary shallow sedation management using a Quality Improvement model Quality  
490 Improvement model wo mochiita tasyokusyu deno sennchinsei kanri no anzensei to kouka](in  
491 Japanese). Jpn J Respir Care. 2020;37: 79–85.
- 492 7. Physiotherapy. C, trust F, Whittington T. A multidisciplinary team approach to weaning from.  
493 Br J Hosp Med.. 2012;73: 462–466.
- 494 8. Kano T, Kataoka Y, Hanajima T, Nakatani K, Sato T, Tsuchiya S, et al. [Effect of ICU  
495 nutritional support protocol operated by multioccupational members at our emergency center

- 496           Touin kyuumei kyuukyuu center ICU ni okeru tasyokusyu unnyou eiyou protocol dounyuu  
497           kouka no kentou](in Japanese). J Jpn Soc Parenter Enter Nutr. 2016;31: 835–842.
- 498   9.   Kim MM, Barnato AE, Angus DC, Fleisher LA, Kahn JM. The effect of multidisciplinary care  
499           teams on intensive care unit mortality. Arch Intern Med. 2010;170: 369–376. doi:  
500           [10.1001/archinternmed.2009.521](https://doi.org/10.1001/archinternmed.2009.521).
- 501   10.   Jacobowski NL, Girard TD, Mulder JA, Ely EW. Communication in critical care: Family  
502           rounds in the intensive care unit. Am J Crit Care. 2010;19: 421–430. doi:  
503           [10.4037/ajcc2010656](https://doi.org/10.4037/ajcc2010656).
- 504   11.   Watanabe K, Takahashi C, Izaki J, Kondo N, Yamamoto I, Tsuchimura M, et al. [Effect of  
505           implementation of a multidisciplinary regular conference in an open ICU]. ICU& CCU Open  
506           ICU ni okeru tasyokusyu sankagata teiki conference no yuuyousei(in Japanese);40; 2016. pp.  
507           293–297.
- 508   12.   Kato A, Honda S, Wada N, Kikuchi S, Souma Y, Fukuzawa T, et al. [The trial of early  
509           rehabilitation after open heart surgery in the intensive care unit Touin ICU deno  
510           sinzoukekkangeka jutugo ni okeru souki rihabilitation no torikumi ni tuite](in Japanese).  
511           Hakodate Medical Journal. 2018;42: 57–61.
- 512   13.   Kramer AA, Higgins TL, Zimmerman JE. The association between ICU readmission rate and  
513           patient outcomes. Crit Care Med. 2013;41: 24–33. doi: [10.1097/CCM.0b013e3182657b8a](https://doi.org/10.1097/CCM.0b013e3182657b8a).
- 514   14.   Santamaria JD, Duke GJ, Pilcher DV, Cooper DJ, Moran J, Bellomo R, et al. Readmissions to  
515           intensive care: A prospective multicenter study in Australia and New Zealand. Crit Care Med.  
516           2017;45: 290–297. doi: [10.1097/CCM.0000000000002066](https://doi.org/10.1097/CCM.0000000000002066).
- 517   15.   Irie K, Urakawa H, Koga M.[DPC hospital management with ADL evaluation in elderly  
518           patients] Koureika iryouken deno DPC shinryou ni okeru ADLhyouka no yuuyousei(in  
519           Japanese). J Jpn Soc Health Care Manag. 2007;8: 432–437.
- 520   16.   Hunter A, Johnson L, Coustasse A. Reduction of intensive care unit length of stay: The case of  
521           early mobilization. Health Care Manag (Frederick). 2020;39: 109–116. doi:

- 522 [10.1097/HCM.0000000000000295](https://doi.org/10.1097/HCM.0000000000000295).
- 523 17. Donovan AL, Aldrich JM, Gross AK, Barchas DM, Thornton KC, Schell-Chaple HM, et al.  
524 Interprofessional care and teamwork in the ICU. Crit Care Med. 2018;46: 980–990. doi:  
525 [10.1097/CCM.0000000000003067](https://doi.org/10.1097/CCM.0000000000003067).
- 526 18. The Committee on Japanese Guidelines for Nutrition Support Therapy in the Adult and  
527 Pediatric Critically Ill Patients. Japanese guidelines for nutrition support therapy in the adult  
528 and pediatric critically ill patients. J Jpn Soc Intensive Care Med. 2016;23: 185-281.
- 529 19. Early Rehabilitation Review Committee. [Japanese Society of Intensive Care Medicine Early  
530 Rehabilitation in Intensive Care ~Evidence-Based Expert Consensus~] Syuutyuu chiryou ni  
531 okeru souki rihabilitation ~konkyo ni motodoku expert consensus~(in Japanese). J Jpn Soc  
532 Intensive Care Med. 2017;24: 255-303.
- 533 20. Katsuyama A, Akazawa C, Teraguchi S. [Literature review on early rehabilitation by  
534 interprofessional collaboration in the Intensive Care Unit] Syuutyuu chiryousitu niokeru  
535 tasyokusyuu niyoru souki rihabilitation ni kansuru bunkenkentou(in Japanese). Osaka Med Coll  
536 J Nurs Res. 2020;10: 32-42.
- 537 21. Fukatani K, Okada H, Hibino M. [Results of a questionnaire survey examining the  
538 effectiveness of the full-time assignment of physical therapists in the Neurosurgery Unit of this  
539 hospital] Touin noushinkei geka byoutou ni okeru rigakuryouhousi no senjuuhaichi niyoru  
540 kouka no kentou(in Japanese). The Medical Journal of Tosei General Hospital. 2017;32: 72-76.
- 541 22. Ely EW, Baker AM, Dunagan DP, Burke HL, Smith AC, Kelly PT, et al. Effect on the duration of  
542 mechanical ventilation of identifying patients capable of breathing spontaneously. N Engl J Med.  
543 1996;335: 1864-1869. doi: [10.1056/NEJM199612193352502](https://doi.org/10.1056/NEJM199612193352502).
- 544 23. Kress JP, Pohlman AS, O'Connor MF, Hall JB. Daily interruption of sedative infusions in  
545 critically ill patients undergoing mechanical ventilation. N Engl J Med. 2000;342: 1471–1477.  
546 doi: [10.1056/NEJM200005183422002](https://doi.org/10.1056/NEJM200005183422002).
- 547 24. Pronovost P, Berenholtz S, Dorman T, Lipsett PA, Simmonds T, Haraden C. Improving

- 548 communication in the ICU using daily goals. *J Crit Care*. 2003;18: 71–75. doi:
- 549 [10.1053/jcrc.2003.50008](https://doi.org/10.1053/jcrc.2003.50008).
- 550 25. Nguyen NQ, Besanko LK, Burgstad C, Bellon M, Holloway RH, Chapman M, et al. Delayed
- 551 enteral feeding impairs intestinal carbohydrate absorption in critically ill Patients. *Crit Care*
- 552 *Med*. 2012;40: 50–54. doi: [10.1097/CCM.0b013e31822d71a6](https://doi.org/10.1097/CCM.0b013e31822d71a6).
- 553 26. Morris PE, Goad A, Thompson C, Taylor K, Harry B, Passmore L, et al. Early intensive care
- 554 unit mobility therapy in the treatment of acute respiratory failure. *Crit Care Med*. 2008;36:
- 555 2238–2243. doi: [10.1097/CCM.0b013e318180b90e](https://doi.org/10.1097/CCM.0b013e318180b90e).
- 556 27. Muehling BM, Halter G, Lang G, Schelzig H, Steffen P, Wagner F, et al. Prospective
- 557 randomized controlled trial to evaluate “fast-track” elective open infrarenal aneurysm repair.
- 558 *Langenbecks Arch Surg*. 2008;393: 281–287. doi: [10.1007/s00423-008-0284-8](https://doi.org/10.1007/s00423-008-0284-8).
- 559 28. Kayambu G, Boots R, Paratz J. Physical therapy for the critically ill in the ICU: A systematic
- 560 review and meta-analysis. *Crit Care Med*. 2013;41: 1543–1554. doi:
- 561 [10.1097/CCM.0b013e31827ca637](https://doi.org/10.1097/CCM.0b013e31827ca637).
- 562 29. Zang K, Chen B, Wang M, Chen D, Hui L, Guo S, et al. The effect of early mobilization in
- 563 critically ill patients: A meta-analysis. *Nurs Crit Care*. 2020;25: 360–367. doi:
- 564 [10.1111/nicc.12455](https://doi.org/10.1111/nicc.12455).
- 565

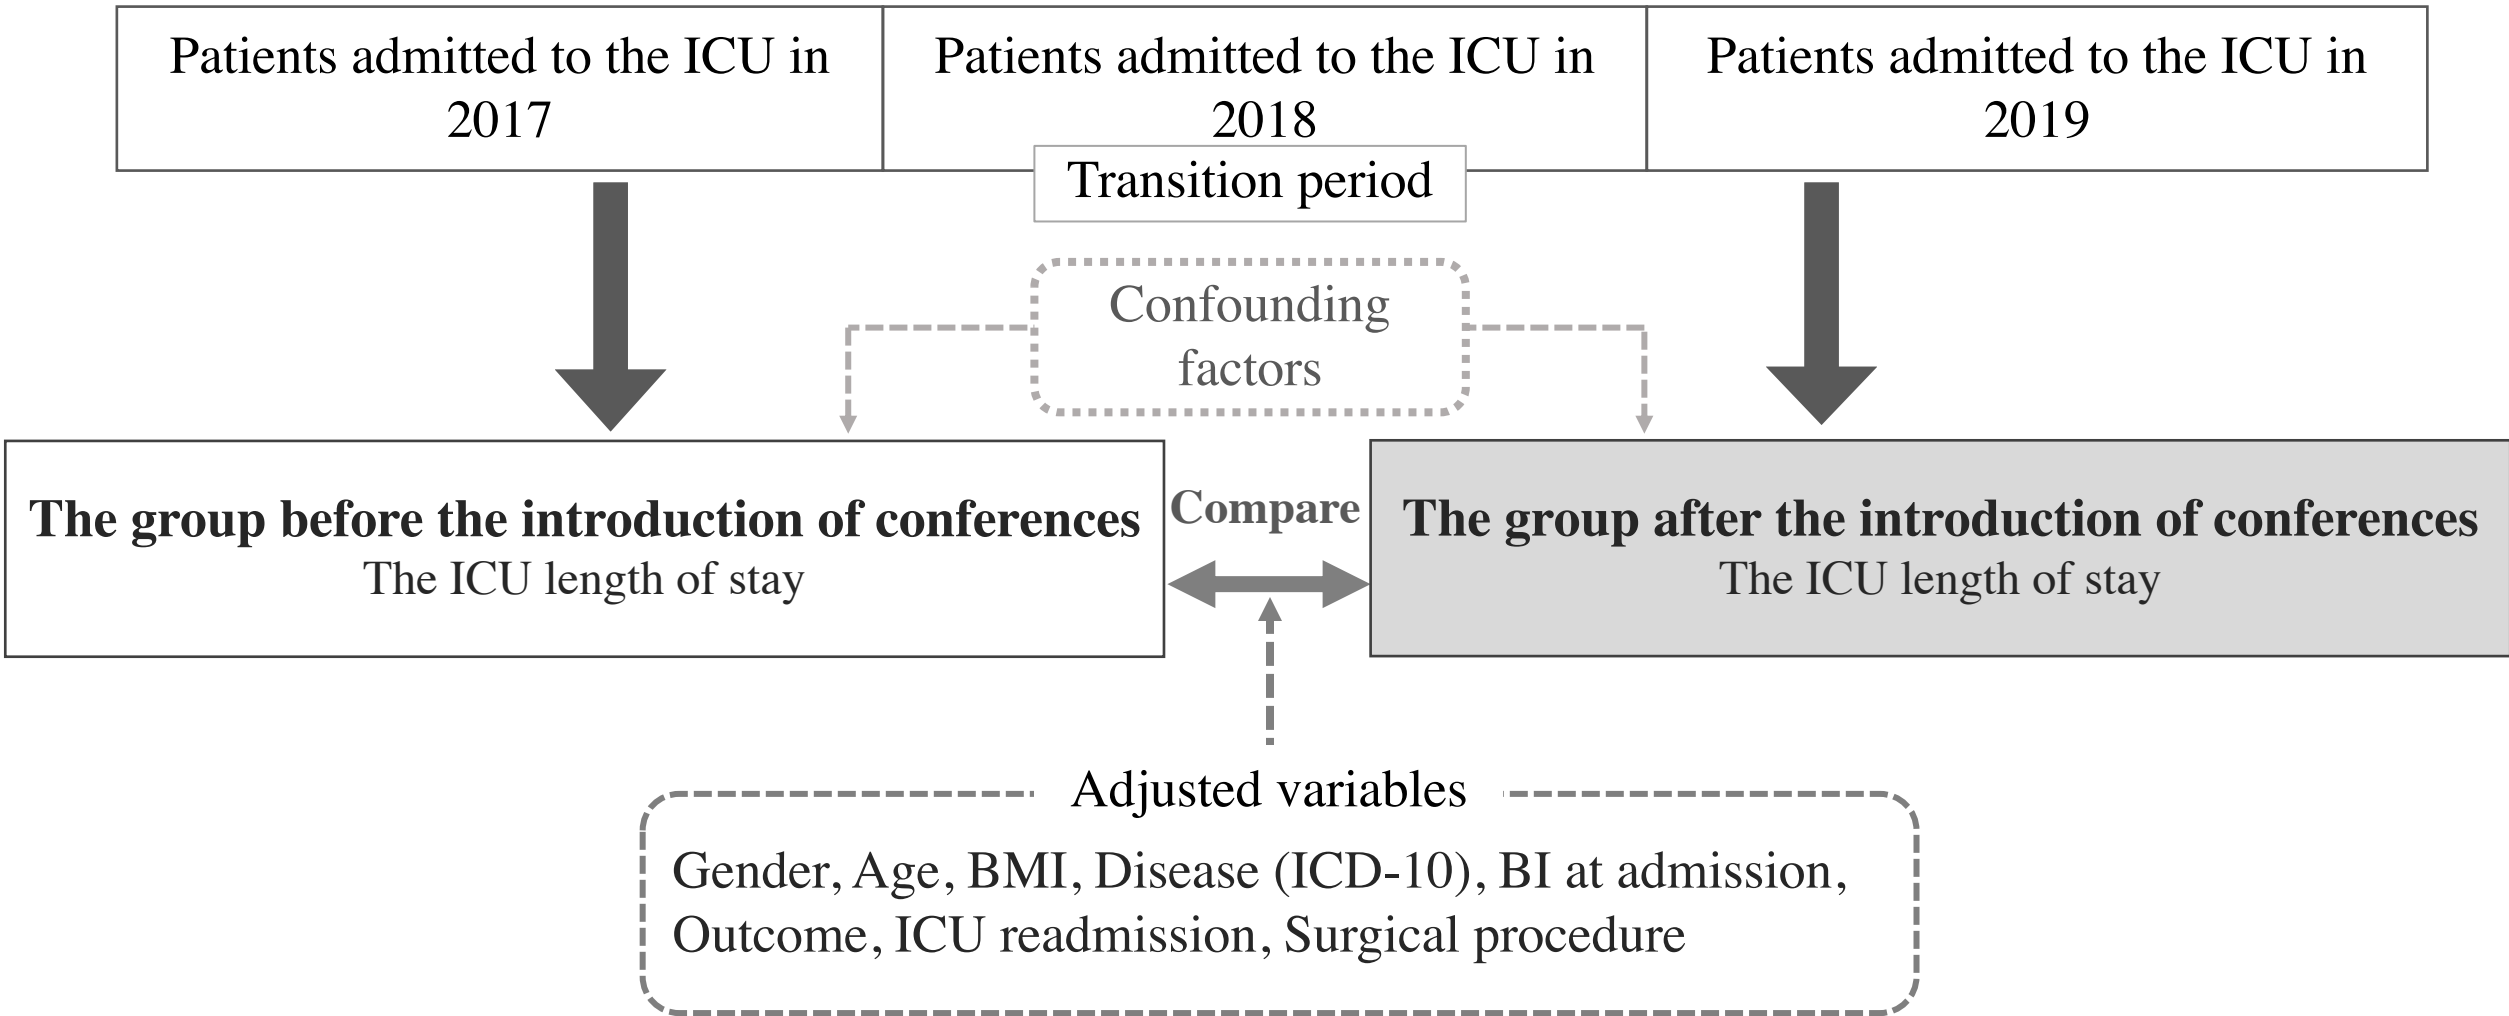

Figure1: The conceptual framework of this study

BMI: Body mass index, ICD-10: International Statistical Classification of Diseases and Related Health Problems 10<sup>th</sup> edition, BI: Barthel index
